# Supplementary material for: A combination of experimental and theoretical methods in evaluating triazole derivatives' mild steel corrosion inhibition ability in an acidic solution
Source: Royal Society of Chemistry journal article supplement (doi:10.1039/d4cp03537b), 2024-01-01
Supplement: d4cp03537b1.pdf [file d4cp03537b1.pdf]

The electronic Supporting Information

**A combination of experimental and theoretical methods in evaluating triazole derivatives' mild steel corrosion inhibition ability in an acidic solution**

Ngo Hong Cat Van<sup>1</sup>, Nguyen Quang Trung<sup>2,3</sup>, Pham Dinh Tu Tai<sup>4</sup>, Pham Cam Nam<sup>5</sup>,  
Dinh Quy Huong<sup>1\*</sup>

<sup>1</sup>Department of Chemistry, University of Education, Hue University, Hue, Vietnam.

<sup>2</sup>The University of Danang—University of Science and Education, Da Nang, Vietnam,

<sup>3</sup>Quality Assurance and Testing Center 2, Danang, Vietnam.

<sup>4</sup>Department of Planning, Finance and Facilities Management, Hue University, Hue, Vietnam.

<sup>5</sup>Department of Chemical Engineering, The University of Danang – University of Science and Technology, Danang, Vietnam.

\*Corresponding: dqhuong@hueuni.edu.vn

**List of supporting information**

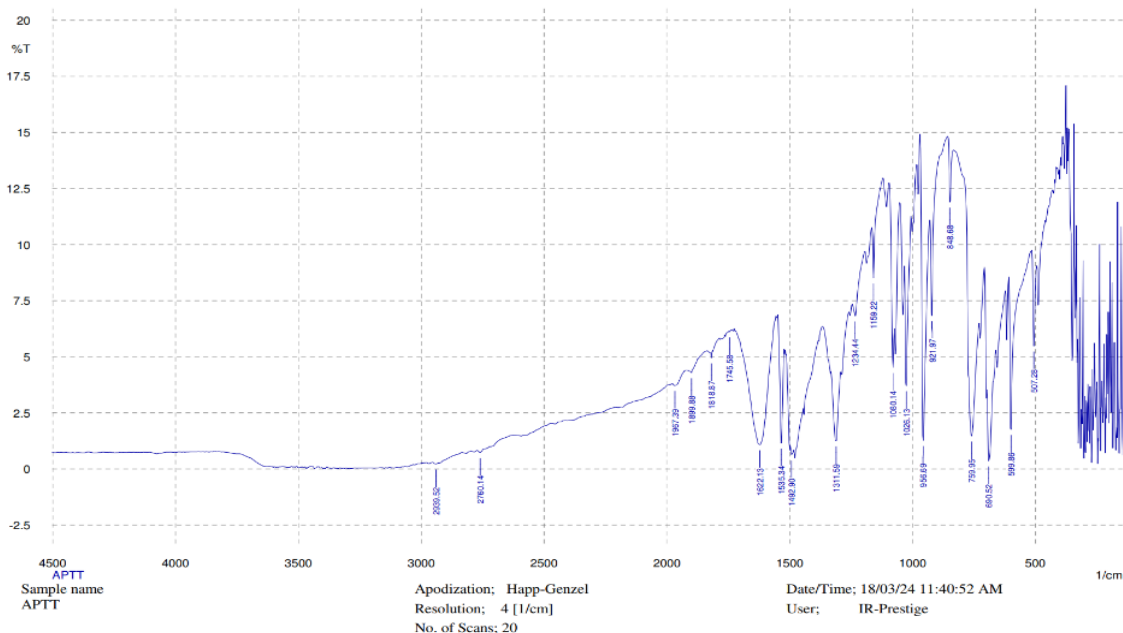

(a) AT

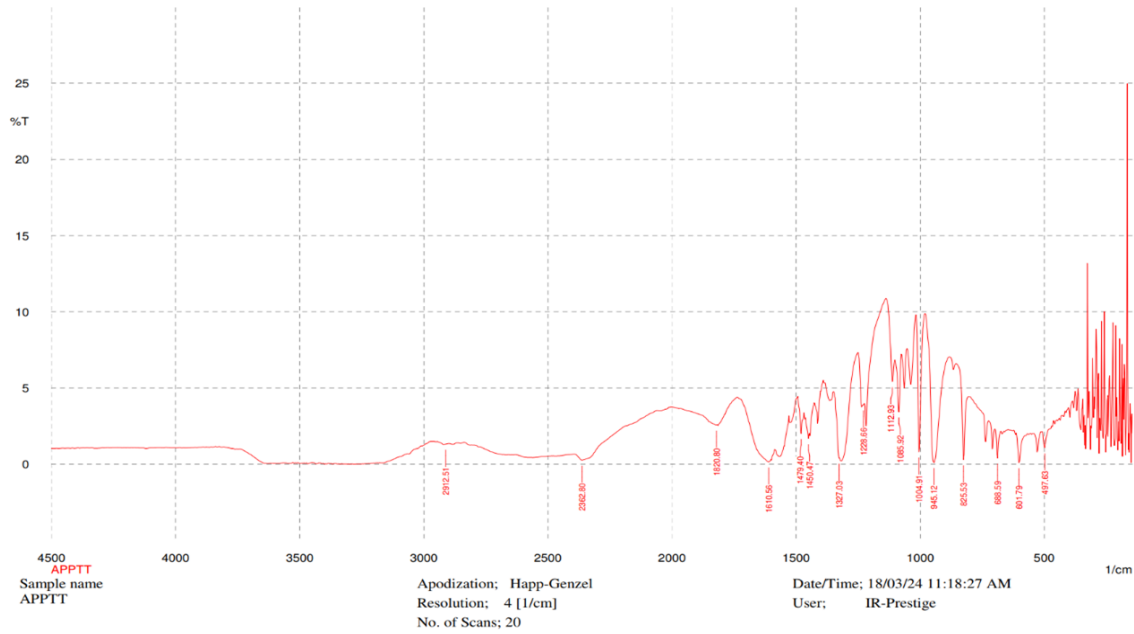

### b. AP

**Figure S1.** IR spectra of (a) AT and (b) AP

**Table S1.** Details of equivalent circuit models using Thales 4.5 software

To accurately match the impedance lines before and after the addition of inhibitors, an equivalent circuit model was employed by using Thales 4.5 software. When inhibitors are introduced into the solution, the composition and structure of the electrical double layer on the surface of mild steel undergo modifications. CPE is used in place of a double-layer capacitance ( $C_{dl}$ ) to give a more accurate fit to the experimental results. The impedance of a CPE can be calculated as shown in equation (1’):

$$Z_{CPE} = Y_o^{-1} \cdot (j\omega)^{-n} \quad (1')$$

Where  $Y_o$ ,  $\omega$ ,  $j$  and  $n$  correspond to constant of CPE, angular frequency, imaginary number, and empirical exponent that reflects towards surface heterogeneity, respectively. CPE values are used for the estimation of double layer capacitance ( $C_{dl}$ ) and are given as follows:

$$C_{dl} = Y_o \cdot (\omega_{max})^{n-1} \quad (2')$$

In equation (2'):

$$\omega_{\max} = 2\pi f_{\max} \quad (3')$$

$f_{\max}$  represents the maximum impedance value ( $-Z_{im}$ ) at the imaginary axis.

**Table S2.** Details of Temkin and Langmuir adsorption isotherm models

Adsorption isotherm models play a crucial role in understanding the interaction between the mild steel surface and the solution, particularly in characterizing the adsorption behavior of inhibitors on the metal surface. Various adsorption isotherms, such as Temkin, Frumkin, Freundlich, Langmuir, and Flory-Huggins, have been widely employed. Among them, two adsorption isotherm models, namely Temkin and Langmuir, were investigated in this study to examine the adsorption of AT and AP on mild steel surfaces.

In the Temkin model, the adsorbed inhibitor molecules do not interact with each other and the free energy of their position on the surface depends on the surface coverage ( $\theta$ ).  $\theta$  is determined using Equation (4'):

$$\theta = \frac{H\%}{100} \quad (4')$$

In which H% is the corrosion inhibition efficiency obtained from the PP method.

The Temkin adsorption isotherm is described by Equation (5'), where  $a$  represents the adsorbate interaction parameter:

$$\ln K \times C = a \times \theta \quad (5')$$

The study also explores the Langmuir adsorption isotherm, which assumes that each adsorbate occupies only one position on the mild steel surface and the surface free energy remains constant at all substrate positions. The Langmuir adsorption isotherm model is mathematically represented by Equation (6'):

$$\frac{C}{\theta} = \frac{1}{K} + C \quad (6')$$

In which,  $K$  is adsorption constant,  $C$  is inhibitor concentration.

**Table S3** Detailed calculations of thermodynamic quantities

The relationship between adsorption constant (K) and adsorption-free energy ( $\Delta G^\circ$ ) can be expressed using Equation (7'), where 55.5 represents the molar concentration of water in the solution (M), and T denotes the temperature under investigation (K).

$$\Delta G^\circ = -R \times T \times \ln(55.5 \times K) \quad (7')$$

From the equation indicating the relationship between  $\ln K$  and  $1/T$ , adsorption enthalpy values ( $\Delta H^\circ$ ) are determined. Additionally, the adsorption entropy ( $\Delta S^\circ$ ) values are calculated from the obtained  $\Delta H^\circ$  and corresponding  $\Delta G^\circ$  using Equation (8'):

$$\Delta G^\circ = \Delta H^\circ - T \times \Delta S^\circ \quad (8')$$

In equation (8'), R denotes the gas constant with a value of  $8.314 \text{ J} \cdot \text{mol}^{-1} \cdot \text{K}^{-1}$ .

**Table S4.** Optimized structure of AT and AP in gas phase using B3LYP/6-311++G(d,p).

|     | Stable $\alpha$ -form (AT) |             |             | $\text{C}_8\text{H}_8\text{N}_4\text{S}$ |
|-----|----------------------------|-------------|-------------|------------------------------------------|
| 0 1 |                            |             |             |                                          |
| N   | 1.12077900                 | 0.42538400  | 0.05243000  |                                          |
| N   | 0.54130000                 | -1.66944900 | -0.22283600 |                                          |
| N   | 1.91039400                 | -1.61613500 | -0.20056000 |                                          |
| N   | 1.05390400                 | 1.81045300  | 0.25597700  |                                          |
| C   | 0.06322100                 | -0.44704900 | -0.07419700 |                                          |
| C   | -1.37397200                | -0.14085900 | -0.02824300 |                                          |
| C   | -2.25360100                | -1.20466900 | 0.23318700  |                                          |
| C   | -1.90221200                | 1.13583200  | -0.26804300 |                                          |
| C   | 2.25421200                 | -0.36813900 | -0.02162900 |                                          |
| C   | -3.62639900                | -0.99253200 | 0.25855600  |                                          |
| C   | -3.28017200                | 1.33899500  | -0.24203100 |                                          |
| C   | -4.14621600                | 0.28061000  | 0.02213900  |                                          |

|                                            |             |             |                                                 |
|--------------------------------------------|-------------|-------------|-------------------------------------------------|
| H                                          | -1.84265700 | -2.19043600 | 0.40891600                                      |
| H                                          | -1.23788100 | 1.96305900  | -0.47054300                                     |
| H                                          | -4.29269400 | -1.82268000 | 0.46400700                                      |
| H                                          | -3.67614700 | 2.33021200  | -0.43251400                                     |
| H                                          | -5.21772000 | 0.44477600  | 0.04292700                                      |
| S                                          | 3.89984900  | 0.27008500  | -0.04154100                                     |
| H                                          | 4.03369000  | 0.42296600  | 1.29571900                                      |
| H                                          | 1.75040300  | 2.24925900  | -0.34057800                                     |
| H                                          | 1.29160800  | 2.01657600  | 1.22321500                                      |
| <b>Stable <math>\beta</math>-form (AT)</b> |             |             | <b>C<sub>8</sub>H<sub>8</sub>N<sub>4</sub>S</b> |
| 0 1                                        |             |             |                                                 |
| N                                          | 1.14530500  | 0.44048200  | 0.05177300                                      |
| N                                          | 0.54044600  | -1.66351000 | -0.20280100                                     |
| N                                          | 1.90052400  | -1.53686400 | -0.17798200                                     |
| N                                          | 1.07140000  | 1.82336900  | 0.23614400                                      |
| C                                          | 0.08034600  | -0.44753800 | -0.06034400                                     |
| C                                          | -1.35756300 | -0.14309600 | -0.01812800                                     |
| C                                          | -2.24385700 | -1.20585500 | 0.22605600                                      |
| C                                          | -1.87618200 | 1.13939400  | -0.24457500                                     |
| C                                          | 2.34006900  | -0.26573600 | -0.02532500                                     |
| C                                          | -3.61519300 | -0.98832200 | 0.24031700                                      |
| C                                          | -3.25378900 | 1.34742300  | -0.22941800                                     |
| C                                          | -4.12671100 | 0.29010200  | 0.01223400                                      |
| H                                          | -1.84387900 | -2.19623000 | 0.40156300                                      |
| H                                          | -1.20449700 | 1.96571400  | -0.42275500                                     |
| H                                          | -4.28702200 | -1.81706900 | 0.43243500                                      |

|                                             |             |                                                 |             |
|---------------------------------------------|-------------|-------------------------------------------------|-------------|
| H                                           | -3.64290600 | 2.34328000                                      | -0.40842300 |
| H                                           | -5.19756000 | 0.45872100                                      | 0.02514800  |
| S                                           | 3.88958000  | 0.34465200                                      | 0.04859800  |
| H                                           | 1.71954600  | 2.24227700                                      | -0.43048900 |
| H                                           | 1.44720700  | 2.03266300                                      | 1.16035700  |
| H                                           | 2.48939400  | -2.34635100                                     | -0.29025000 |
| <b>Stable <math>\alpha</math>-form (AP)</b> |             | <b>C<sub>7</sub>H<sub>7</sub>N<sub>5</sub>S</b> |             |
| 0 1                                         |             |                                                 |             |
| N                                           | 1.11923500  | 0.43004800                                      | 0.03636000  |
| N                                           | 0.53003000  | -1.67361300                                     | -0.13378800 |
| N                                           | 1.89729800  | -1.62569100                                     | -0.12118400 |
| N                                           | 1.05740100  | 1.82510300                                      | 0.15513500  |
| C                                           | 0.05888400  | -0.44378300                                     | -0.04355600 |
| C                                           | -1.37819600 | -0.13657100                                     | -0.01774600 |
| C                                           | -2.27511100 | -1.20114700                                     | 0.15192900  |
| C                                           | -1.91870900 | 1.14461900                                      | -0.17590400 |
| C                                           | 2.24782600  | -0.37063400                                     | -0.00552600 |
| C                                           | -3.63882500 | -0.93713700                                     | 0.15942500  |
| C                                           | -3.30428300 | 1.29312200                                      | -0.15215300 |
| H                                           | -1.90217900 | -2.20964800                                     | 0.27149700  |
| H                                           | -1.28112600 | 2.00504500                                      | -0.31232000 |
| H                                           | -4.34791600 | -1.74915000                                     | 0.29130500  |
| H                                           | -3.74191500 | 2.28004500                                      | -0.27428100 |
| S                                           | 3.89692400  | 0.25607500                                      | -0.06164000 |
| H                                           | 4.03089000  | 0.47644600                                      | 1.26599700  |
| H                                           | 1.72477000  | 2.22731000                                      | -0.49795800 |

|                                            |             |                                                 |             |
|--------------------------------------------|-------------|-------------------------------------------------|-------------|
| H                                          | 1.33620000  | 2.09150100                                      | 1.09620500  |
| N                                          | -4.16382200 | 0.28564400                                      | 0.01304500  |
| <b>Stable <math>\beta</math>-form (AP)</b> |             | <b>C<sub>7</sub>H<sub>7</sub>N<sub>5</sub>S</b> |             |
| 0 1                                        |             |                                                 |             |
| N                                          | 1.14365800  | 0.44672000                                      | 0.02463600  |
| N                                          | 0.53057500  | -1.66691000                                     | -0.09347600 |
| N                                          | 1.88748600  | -1.54681800                                     | -0.08442200 |
| N                                          | 1.07548700  | 1.83904800                                      | 0.11235900  |
| C                                          | 0.07658900  | -0.44280200                                     | -0.02697500 |
| C                                          | -1.36217200 | -0.13922200                                     | -0.00919800 |
| C                                          | -2.26608600 | -1.20535000                                     | 0.11047900  |
| C                                          | -1.89262500 | 1.15011000                                      | -0.12048600 |
| C                                          | 2.33595100  | -0.26866200                                     | -0.01225000 |
| C                                          | -3.62775100 | -0.93478600                                     | 0.11198900  |
| C                                          | -3.27854500 | 1.30426400                                      | -0.10734900 |
| H                                          | -1.90569300 | -2.22151500                                     | 0.20012600  |
| H                                          | -1.24643000 | 2.00996400                                      | -0.20888900 |
| H                                          | -4.34237600 | -1.74730200                                     | 0.20451200  |
| H                                          | -3.70926100 | 2.29778700                                      | -0.19328800 |
| S                                          | 3.88652400  | 0.33391000                                      | 0.02170400  |
| H                                          | 1.66203600  | 2.21357000                                      | -0.63294000 |
| H                                          | 1.52320800  | 2.11338000                                      | 0.98624800  |
| H                                          | 2.47195300  | -2.36598800                                     | -0.13740000 |
| N                                          | -4.14434700 | 0.29599400                                      | 0.00620300  |

**Table S5.** Optimized structures of protonated AT and AP in gas phase using B3LYP/6-311G(d,p)

|     | <b>pAT-N1</b> |             | <b>[C<sub>8</sub>H<sub>9</sub>N<sub>4</sub>S]<sup>+</sup></b> |
|-----|---------------|-------------|---------------------------------------------------------------|
| 1 1 |               |             |                                                               |
| N   | -1.09848800   | -0.55859700 | -0.11110600                                                   |
| N   | -0.57183900   | 1.65271400  | 0.09083600                                                    |
| N   | -1.93705500   | 1.51529900  | 0.02993000                                                    |
| N   | -1.03103600   | -1.59107400 | 0.89804500                                                    |
| C   | -0.02206700   | 0.49628200  | 0.00913000                                                    |
| C   | 1.38821400    | 0.17504700  | -0.01725900                                                   |
| C   | 2.30981000    | 1.22889100  | 0.15616600                                                    |
| C   | 1.85539700    | -1.13232900 | -0.24725100                                                   |
| C   | -2.42057000   | 0.27358400  | -0.12382200                                                   |
| C   | 3.66882200    | 0.96942700  | 0.09910800                                                    |
| C   | 3.22172300    | -1.37546700 | -0.30720700                                                   |
| C   | 4.12810200    | -0.33020400 | -0.13459700                                                   |
| H   | 1.94958300    | 2.23467200  | 0.33115300                                                    |
| H   | 1.16754800    | -1.96109200 | -0.35495900                                                   |
| H   | 4.37524200    | 1.77910800  | 0.23467500                                                    |
| H   | 3.57910900    | -2.38216300 | -0.48487100                                                   |
| H   | 5.19277700    | -0.52627300 | -0.17967000                                                   |
| S   | -3.88378200   | -0.38762600 | -0.26386600                                                   |
| H   | -1.92342200   | -2.09023000 | 0.84722600                                                    |
| H   | -0.97993700   | -1.12478200 | 1.80375500                                                    |
| H   | -2.50826100   | 2.34931800  | 0.08113100                                                    |
| H   | -1.01980700   | -1.03633100 | -1.01613200                                                   |
|     | <b>pAT-N2</b> |             | <b>[C<sub>8</sub>H<sub>9</sub>N<sub>4</sub>S]<sup>+</sup></b> |
| 1 1 |               |             |                                                               |



|               |             |             |                                                               |
|---------------|-------------|-------------|---------------------------------------------------------------|
| N             | -1.12086100 | -0.45132900 | 0.10329700                                                    |
| N             | -0.59356400 | 1.58088100  | -0.35176700                                                   |
| N             | -1.96951100 | 1.54568800  | -0.18256100                                                   |
| N             | -0.99882400 | -1.81184800 | 0.37041000                                                    |
| C             | -0.07066500 | 0.38208100  | -0.09477000                                                   |
| C             | 1.35531800  | 0.11959200  | -0.02718500                                                   |
| C             | 2.21661700  | 1.16178200  | 0.37111200                                                    |
| C             | 1.88859700  | -1.12903400 | -0.39380100                                                   |
| C             | -2.36592700 | 0.23743000  | -0.00749800                                                   |
| C             | 3.58749400  | 0.95629100  | 0.39540400                                                    |
| C             | 3.26476400  | -1.31533100 | -0.37743900                                                   |
| C             | 4.11294100  | -0.28035900 | 0.01533200                                                    |
| H             | 1.82267200  | 2.11437300  | 0.70887400                                                    |
| H             | 1.23380800  | -1.93433600 | -0.69086200                                                   |
| H             | 4.24565400  | 1.75280100  | 0.71944900                                                    |
| H             | 3.67632500  | -2.27309400 | -0.67091400                                                   |
| H             | 5.18482500  | -0.43796500 | 0.03315400                                                    |
| S             | -3.85834700 | -0.40284900 | 0.06677700                                                    |
| H             | -1.62390600 | -2.30803500 | -0.26442700                                                   |
| H             | -1.32849300 | -1.98409400 | 1.31945100                                                    |
| H             | -2.53804300 | 2.21838200  | -0.68367700                                                   |
| H             | -0.09479400 | 2.45909200  | -0.40205800                                                   |
| <b>pAT-N3</b> |             |             | <b>[C<sub>8</sub>H<sub>9</sub>N<sub>4</sub>S]<sup>+</sup></b> |
| 1 1           |             |             |                                                               |
| N             | 1.12039100  | 0.47474900  | 0.04807500                                                    |
| N             | 0.48380700  | -1.66523800 | -0.30980000                                                   |

|               |             |                                                               |             |
|---------------|-------------|---------------------------------------------------------------|-------------|
| N             | 1.93876200  | -1.56785700                                                   | -0.27186200 |
| N             | 0.95518200  | 1.83344300                                                    | 0.30976500  |
| C             | 0.05962200  | -0.44947200                                                   | -0.10733800 |
| C             | -1.36102600 | -0.13961700                                                   | -0.02946000 |
| C             | -2.22809600 | -1.18863600                                                   | 0.33910000  |
| C             | -1.89144500 | 1.11878200                                                    | -0.36822100 |
| C             | 2.34126300  | -0.13187100                                                   | -0.02118200 |
| C             | -3.59649100 | -0.97383200                                                   | 0.38021200  |
| C             | -3.26646900 | 1.31374800                                                    | -0.33748900 |
| C             | -4.11802800 | 0.27623300                                                    | 0.03999400  |
| H             | -1.82011800 | -2.15640500                                                   | 0.60057100  |
| H             | -1.24108300 | 1.92925900                                                    | -0.65743800 |
| H             | -4.25825200 | -1.77792700                                                   | 0.67756000  |
| H             | -3.67413500 | 2.27991400                                                    | -0.60828800 |
| H             | -5.18875200 | 0.44071600                                                    | 0.07020800  |
| S             | 3.85219600  | 0.40582000                                                    | 0.11625300  |
| H             | 1.55257400  | 2.36284800                                                    | -0.32208100 |
| H             | 1.23575300  | 2.03022500                                                    | 1.26903100  |
| H             | 2.31281100  | -2.17612700                                                   | 0.46710100  |
| H             | 2.32308800  | -1.90331000                                                   | -1.16365200 |
| <b>pAT-N4</b> |             | <b>[C<sub>8</sub>H<sub>9</sub>N<sub>4</sub>S]<sup>+</sup></b> |             |
| 1 1           |             |                                                               |             |
| N             | 1.10580300  | 0.35421300                                                    | -0.04358500 |
| N             | 0.56155700  | -1.72763700                                                   | -0.42835900 |
| N             | 1.92850000  | -1.57218500                                                   | -0.37619600 |
| N             | 1.17936600  | 1.65708400                                                    | 0.46322000  |

|                |             |                                                               |             |
|----------------|-------------|---------------------------------------------------------------|-------------|
| C              | 0.04616400  | -0.55919300                                                   | -0.19213000 |
| C              | -1.37036200 | -0.22073200                                                   | -0.09023000 |
| C              | -2.24591000 | -1.13622100                                                   | 0.51148200  |
| C              | -1.86610300 | 0.98741500                                                    | -0.60614300 |
| C              | 2.32991100  | -0.32244600                                                   | -0.10767800 |
| C              | -3.59959000 | -0.83418100                                                   | 0.60539300  |
| C              | -3.22177400 | 1.28055900                                                    | -0.50667100 |
| C              | -4.08724100 | 0.37244000                                                    | 0.10350300  |
| H              | -1.86074600 | -2.07032900                                                   | 0.90107700  |
| H              | -1.21840100 | 1.67010400                                                    | -1.14824100 |
| H              | -4.27485600 | -1.54098800                                                   | 1.07194000  |
| H              | -3.60612500 | 2.20429100                                                    | -0.92171800 |
| H              | -5.14338700 | 0.60198400                                                    | 0.17857700  |
| S              | 3.77434600  | 0.45545400                                                    | 0.19359600  |
| H              | 2.31035000  | 1.72318400                                                    | 0.56062900  |
| H              | 0.71178800  | 1.75473400                                                    | 1.37183000  |
| H              | 2.52482900  | -2.37446100                                                   | -0.52620000 |
| H              | 0.82986700  | 2.35805800                                                    | -0.19614200 |
| <b>pAT-S18</b> |             | <b>[C<sub>8</sub>H<sub>9</sub>N<sub>4</sub>S]<sup>+</sup></b> |             |
| 1 1            |             |                                                               |             |
| N              | 1.10587600  | 0.43002000                                                    | 0.05756900  |
| N              | 0.50784200  | -1.66299600                                                   | -0.32386700 |
| N              | 1.86650600  | -1.53492300                                                   | -0.26974200 |
| N              | 1.00405700  | 1.78622700                                                    | 0.34624300  |
| C              | 0.03029500  | -0.45972600                                                   | -0.11399600 |
| C              | -1.39388400 | -0.14833500                                                   | -0.04117300 |

|               |             |                                                               |             |
|---------------|-------------|---------------------------------------------------------------|-------------|
| C             | -2.26223800 | -1.18488600                                                   | 0.34503900  |
| C             | -1.91718200 | 1.10721700                                                    | -0.38828300 |
| C             | 2.25559500  | -0.28732300                                                   | -0.04637100 |
| C             | -3.63117600 | -0.96117900                                                   | 0.39040800  |
| C             | -3.29093300 | 1.31578700                                                    | -0.34580400 |
| C             | -4.14781200 | 0.28814300                                                    | 0.04529500  |
| H             | -1.85831200 | -2.15328400                                                   | 0.61159000  |
| H             | -1.26488400 | 1.91115300                                                    | -0.69527300 |
| H             | -4.29544600 | -1.76027100                                                   | 0.69596700  |
| H             | -3.69297400 | 2.28301900                                                    | -0.62167100 |
| H             | -5.21715300 | 0.45981800                                                    | 0.08018700  |
| S             | 3.83352600  | 0.42787400                                                    | 0.11273000  |
| H             | 1.47525200  | 2.35003100                                                    | -0.35413900 |
| H             | 1.32540800  | 1.98968300                                                    | 1.28769900  |
| H             | 2.44111200  | -2.35347900                                                   | -0.42201300 |
| H             | 4.50463400  | -0.71913500                                                   | -0.12812200 |
| <b>pAP-N1</b> |             | <b>[C<sub>7</sub>H<sub>8</sub>N<sub>5</sub>S]<sup>+</sup></b> |             |
| 1 1           |             |                                                               |             |
| N             | 1.09649200  | 0.56290100                                                    | -0.11933000 |
| N             | 0.56572400  | -1.64183600                                                   | 0.11270500  |
| N             | 1.92801200  | -1.51663800                                                   | 0.04879700  |
| N             | 1.02442600  | 1.61254200                                                    | 0.87080900  |
| C             | 0.02194800  | -0.48703800                                                   | 0.01672500  |
| C             | -1.39659300 | -0.17153800                                                   | -0.01601600 |
| C             | -2.32223700 | -1.21507600                                                   | 0.14832700  |
| C             | -1.87870600 | 1.12518300                                                    | -0.23995700 |

|               |             |                                                               |             |
|---------------|-------------|---------------------------------------------------------------|-------------|
| C             | 2.41907000  | -0.27550700                                                   | -0.11988200 |
| C             | -3.67536000 | -0.90710900                                                   | 0.07996400  |
| C             | -3.25931000 | 1.31256600                                                    | -0.29298600 |
| H             | -1.99485000 | -2.23208700                                                   | 0.32043300  |
| H             | -1.22133600 | 1.97800100                                                    | -0.34544900 |
| H             | -4.41869100 | -1.68783200                                                   | 0.20344400  |
| H             | -3.66642900 | 2.30373500                                                    | -0.46497600 |
| S             | 3.88324200  | 0.37290100                                                    | -0.26623400 |
| H             | 1.90024100  | 2.13632200                                                    | 0.79238500  |
| H             | 1.00303800  | 1.16546100                                                    | 1.78748100  |
| H             | 2.49413600  | -2.35367200                                                   | 0.11392400  |
| N             | -4.14309800 | 0.32722000                                                    | -0.13750200 |
| H             | 1.01825800  | 1.02544700                                                    | -1.03290600 |
| <b>pAP-N2</b> |             | <b>[C<sub>7</sub>H<sub>8</sub>N<sub>5</sub>S]<sup>+</sup></b> |             |
| 11            |             |                                                               |             |
| N             | -1.11206000 | -0.44783200                                                   | 0.11545800  |
| N             | -0.59196500 | 1.57912100                                                    | -0.36684800 |
| N             | -1.96680800 | 1.53887000                                                    | -0.21673000 |
| N             | -0.97373400 | -1.80254700                                                   | 0.40184900  |
| C             | -0.07226600 | 0.38632500                                                    | -0.09809000 |
| C             | 1.36211200  | 0.12235400                                                    | -0.03327600 |
| C             | 2.22418600  | 1.12739100                                                    | 0.43028900  |
| C             | 1.90668400  | -1.09390000                                                   | -0.46049900 |
| C             | -2.36456100 | 0.23407100                                                    | -0.01196900 |
| C             | 3.59174400  | 0.86757000                                                    | 0.43927000  |
| C             | 3.29299000  | -1.23533400                                                   | -0.41714000 |

|               |             |                                                               |             |
|---------------|-------------|---------------------------------------------------------------|-------------|
| H             | 1.85774900  | 2.07023900                                                    | 0.82042000  |
| H             | 1.28343100  | -1.90103700                                                   | -0.81552300 |
| H             | 4.28822800  | 1.61574800                                                    | 0.80345400  |
| H             | 3.75448900  | -2.15945900                                                   | -0.74941200 |
| S             | -3.85215600 | -0.40926400                                                   | 0.07559400  |
| H             | -1.59136500 | -2.31672500                                                   | -0.22607000 |
| H             | -1.29915000 | -1.96606800                                                   | 1.35403000  |
| H             | -2.53811200 | 2.21855000                                                    | -0.70519900 |
| N             | 4.11997100  | -0.28450800                                                   | 0.02116000  |
| H             | -0.09393200 | 2.45439200                                                    | -0.46693300 |
| <b>pAP-N3</b> |             | <b>[C<sub>7</sub>H<sub>8</sub>N<sub>5</sub>S]<sup>+</sup></b> |             |
| 1 1           |             |                                                               |             |
| N             | 1.11170900  | 0.47220000                                                    | 0.05867400  |
| N             | 0.48123000  | -1.66363600                                                   | -0.33011700 |
| N             | 1.93830000  | -1.56433300                                                   | -0.29510000 |
| N             | 0.92749700  | 1.82449400                                                    | 0.33663600  |
| C             | 0.06305700  | -0.45320200                                                   | -0.11326100 |
| C             | -1.36674300 | -0.14411100                                                   | -0.03784900 |
| C             | -2.23612800 | -1.15963200                                                   | 0.38731500  |
| C             | -1.90809600 | 1.08763500                                                    | -0.42585700 |
| C             | 2.33916100  | -0.12859700                                                   | -0.02016100 |
| C             | -3.60011800 | -0.88921300                                                   | 0.41687100  |
| C             | -3.29270300 | 1.23851600                                                    | -0.36773300 |
| H             | -1.86022000 | -2.12636100                                                   | 0.69544500  |
| H             | -1.28868100 | 1.90370600                                                    | -0.76403100 |
| H             | -4.30050900 | -1.64759600                                                   | 0.75112400  |

|               |             |                                                               |             |
|---------------|-------------|---------------------------------------------------------------|-------------|
| H             | -3.74843300 | 2.17653200                                                    | -0.66797000 |
| S             | 3.84509800  | 0.41291600                                                    | 0.12398600  |
| H             | 1.50534600  | 2.37340300                                                    | -0.29670100 |
| H             | 1.21159400  | 2.01728700                                                    | 1.29559700  |
| H             | 2.31183000  | -2.18719800                                                   | 0.43214700  |
| N             | -4.12477200 | 0.28273400                                                    | 0.04831400  |
| H             | 2.31916300  | -1.88500900                                                   | -1.19419500 |
| <b>pAP-N4</b> |             | <b>[C<sub>7</sub>H<sub>8</sub>N<sub>5</sub>S]<sup>+</sup></b> |             |
| 11            |             |                                                               |             |
| N             | 1.10381000  | 0.35318000                                                    | -0.02833200 |
| N             | 0.54566200  | -1.72709600                                                   | -0.40101800 |
| N             | 1.91128200  | -1.58212400                                                   | -0.35975300 |
| N             | 1.19930000  | 1.66896800                                                    | 0.43861100  |
| C             | 0.04093500  | -0.55379300                                                   | -0.17308200 |
| C             | -1.38013600 | -0.21549700                                                   | -0.08485100 |
| C             | -2.26750000 | -1.11761100                                                   | 0.50862900  |
| C             | -1.88492300 | 0.98576600                                                    | -0.59693200 |
| C             | 2.32243400  | -0.33209500                                                   | -0.10142900 |
| C             | -3.61497300 | -0.76695300                                                   | 0.57288000  |
| C             | -3.25149300 | 1.23298100                                                    | -0.47762400 |
| H             | -1.91874200 | -2.06010700                                                   | 0.91090200  |
| H             | -1.26398100 | 1.69244600                                                    | -1.13774900 |
| H             | -4.33253000 | -1.44129700                                                   | 1.02899600  |
| H             | -3.67903800 | 2.14863200                                                    | -0.87404300 |
| S             | 3.77168100  | 0.44429400                                                    | 0.17570300  |
| H             | 2.34669600  | 1.71392100                                                    | 0.51565500  |

|                |             |                                                               |             |
|----------------|-------------|---------------------------------------------------------------|-------------|
| H              | 0.75235500  | 1.80090900                                                    | 1.35288200  |
| H              | 2.50060700  | -2.39020000                                                   | -0.50927300 |
| N              | -4.10150600 | 0.38335500                                                    | 0.10076000  |
| H              | 0.85183100  | 2.35622200                                                    | -0.23604900 |
| <b>pAP-N20</b> |             | <b>[C<sub>7</sub>H<sub>8</sub>N<sub>5</sub>S]<sup>+</sup></b> |             |
| 1 1            |             |                                                               |             |
| N              | 1.18502000  | 0.46983000                                                    | -0.00005400 |
| N              | 0.57116500  | -1.65267000                                                   | -0.00007300 |
| N              | 1.90389900  | -1.54772800                                                   | -0.00006500 |
| N              | 1.10685400  | 1.86373600                                                    | 0.00015600  |
| C              | 0.12101000  | -0.41756200                                                   | -0.00003500 |
| C              | -1.30375400 | -0.14297700                                                   | -0.00002100 |
| C              | -2.20084600 | -1.23617100                                                   | 0.00008600  |
| C              | -1.84226800 | 1.16096600                                                    | -0.00010600 |
| C              | 2.37995400  | -0.25441200                                                   | -0.00003800 |
| C              | -3.55294800 | -1.01217400                                                   | 0.00010400  |
| C              | -3.20681400 | 1.33292100                                                    | -0.00008800 |
| H              | -1.82560000 | -2.25010400                                                   | 0.00014300  |
| H              | -1.18786500 | 2.02053200                                                    | -0.00019000 |
| H              | -4.28700900 | -1.80621100                                                   | 0.00017600  |
| H              | -3.67850400 | 2.30629400                                                    | -0.00015400 |
| S              | 3.92204800  | 0.31022800                                                    | 0.00003200  |
| H              | 1.61761800  | 2.20202600                                                    | -0.81599400 |
| H              | 1.61801400  | 2.20177400                                                    | 0.81616800  |
| H              | 2.48345300  | -2.37672000                                                   | -0.00004700 |
| N              | -4.02801100 | 0.25932500                                                    | 0.00002900  |



|     |                |             |                                                               |
|-----|----------------|-------------|---------------------------------------------------------------|
| H   | -5.03136500    | 0.40777000  | 0.00002700                                                    |
|     | <b>pAP-S16</b> |             | <b>[C<sub>7</sub>H<sub>8</sub>N<sub>5</sub>S]<sup>+</sup></b> |
| 1 1 |                |             |                                                               |
| N   | 1.10087000     | 0.42998000  | 0.05758900                                                    |
| N   | 0.50273300     | -1.66375300 | -0.31440000                                                   |
| N   | 1.86053800     | -1.53637800 | -0.26702600                                                   |
| N   | 0.99141500     | 1.78828600  | 0.33372500                                                    |
| C   | 0.03007600     | -0.46101200 | -0.11014400                                                   |
| C   | -1.39958800    | -0.14883400 | -0.04275000                                                   |
| C   | -2.27628000    | -1.16677800 | 0.35475800                                                    |
| C   | -1.93370000    | 1.09401700  | -0.39870900                                                   |
| C   | 2.25123200     | -0.28701000 | -0.04552600                                                   |
| C   | -3.63958900    | -0.88999300 | 0.38371200                                                    |
| C   | -3.31679300    | 1.25552300  | -0.33561200                                                   |
| H   | -1.90711900    | -2.14398300 | 0.63755000                                                    |
| H   | -1.31029100    | 1.91532300  | -0.71861500                                                   |
| H   | -4.34487000    | -1.65512400 | 0.69166900                                                    |
| H   | -3.76448000    | 2.20570400  | -0.60909500                                                   |
| S   | 3.82790500     | 0.42771900  | 0.11138300                                                    |
| H   | 1.46062500     | 2.34803200  | -0.37152200                                                   |
| H   | 1.31080400     | 2.00214200  | 1.27375700                                                    |
| H   | 2.43431000     | -2.35660800 | -0.41637700                                                   |
| N   | -4.15793600    | 0.29446800  | 0.04867700                                                    |
| H   | 4.49905900     | -0.72269900 | -0.11382500                                                   |
